# Supplementary material for: Myeloperoxidase-Derived 2-Chlorohexadecanal Is Generated in Mouse Heart during Endotoxemia and Induces Modification of Distinct Cardiomyocyte Protein Subsets In Vitro
Source: Int J Mol Sci. 2020 Dec 3;21(23):9235. doi: 10.3390/ijms21239235 (PMC7730634; doi:10.3390/ijms21239235)
Supplement: Supplementary file 1 [file ijms-21-09235-s001.pdf]

## **SUPPLEMENTARY INFORMATION**

**Myeloperoxidase-derived 2-chlorohexadecanal is generated in mouse heart during endotoxemia and induces modification of distinct cardiomyocyte protein subsets in vitro**

Jürgen Prasch, Eva Bernhart, Helga Reicher, Manfred Kollroser, Gerald N. Rechberger, Chintan N. Koyani, Christopher Trummer, Lavinia Rech, Peter P. Rainer, Astrid Hammer, Ernst Malle, Wolfgang Sattler

**Table S1:** Biological process gene ontology (GO) enrichment analysis.

| #term ID   | term description                                                         | observed gene count | background gene count | false discovery rate | matching proteins in network (labels)                                                                                                                                                                                                                                                       |
|------------|--------------------------------------------------------------------------|---------------------|-----------------------|----------------------|---------------------------------------------------------------------------------------------------------------------------------------------------------------------------------------------------------------------------------------------------------------------------------------------|
| GO:0006457 | protein folding                                                          | 10                  | 153                   | 5.21e-09             | Cct3,Cct5,Cct8,Fkbp4,Hsp90aa1,Hsp a11,Hspb1,Pdia3,Pdia6,Tcp1                                                                                                                                                                                                                                |
| GO:0007339 | binding of sperm to zona pellucida                                       | 6                   | 36                    | 4.02e-07             | Aldoa,Cct3,Cct5,Cct8,Hspa11,Tcp1                                                                                                                                                                                                                                                            |
| GO:0061077 | chaperone-mediated protein folding                                       | 6                   | 60                    | 2.67e-06             | Cct3,Cct5,Cct8,Fkbp4,Hspb1,Tcp1                                                                                                                                                                                                                                                             |
| GO:0017144 | drug metabolic process                                                   | 11                  | 494                   | 4.06e-06             | Aldh2,Aldoa,Eno1,Gapdh,Hsp90aa1,ldh3a,Ldha,Ndufs2,Pgam1,Phgdh,Uq crc1                                                                                                                                                                                                                       |
| GO:2000573 | positive regulation of DNA biosynthetic process                          | 6                   | 69                    | 4.16e-06             | Cct3,Cct5,Cct8,Ddx39b,Hsp90aa1,Tc p1                                                                                                                                                                                                                                                        |
| GO:0009987 | cellular process                                                         | 47                  | 12459                 | 4.22e-06             | Alad,Alb,Aldh2,Aldoa,Cct3,Cct5,Cct8, Dctn2,Ddx39,Ddx39b,Des,Eef1g,Eef 2,Eif3f,Eif4a2,Eno1,Fdps,Fkbp4,Gap dh,Hnrnp1,Hsp90aa1,Hspa11,Hspb1,ldh3a,Ldha,Lmna,Lyz1,Ndufs2,Pcna, Pdia3,Pdia6,Pgam1,Phgdh,Prph,Psm d13,Rpsa,Ruvbl2,Tcp1,Tuba3b,Tubal 3,Tubb3,Tubb6,Uap111,Uqcrc1,Uqcrc 2,Vim,Ywhab |
| GO:1904851 | positive regulation of establishment of protein localization to telomere | 4                   | 10                    | 4.22e-06             | Cct3,Cct5,Cct8,Tcp1                                                                                                                                                                                                                                                                         |
| GO:0046031 | ADP metabolic process                                                    | 5                   | 44                    | 1.07e-05             | Aldoa,Eno1,Gapdh,Ldha,Pgam1                                                                                                                                                                                                                                                                 |
| GO:0046034 | ATP metabolic process                                                    | 7                   | 162                   | 1.15e-05             | Aldoa,Eno1,Gapdh,Ldha,Ndufs2,Pga m1,Uqcrc1                                                                                                                                                                                                                                                  |
| GO:0046496 | nicotinamide nucleotide metabolic process                                | 6                   | 101                   | 1.55e-05             | Aldoa,Eno1,Gapdh,ldh3a,Ldha,Pgam 1                                                                                                                                                                                                                                                          |
| GO:0006090 | pyruvate metabolic process                                               | 5                   | 62                    | 2.34e-05             | Aldoa,Eno1,Gapdh,Ldha,Pgam1                                                                                                                                                                                                                                                                 |
| GO:0006091 | generation of precursor metabolites and energy                           | 8                   | 295                   | 2.34e-05             | Aldoa,Eno1,Gapdh,ldh3a,Ldha,Ndufs 2,Pgam1,Uqcrc1                                                                                                                                                                                                                                            |
| GO:0009167 | purine ribonucleoside monophosphate metabolic process                    | 7                   | 196                   | 2.34e-05             | Aldoa,Eno1,Gapdh,Ldha,Ndufs2,Pga m1,Uqcrc1                                                                                                                                                                                                                                                  |
| GO:0051054 | positive regulation of DNA metabolic process                             | 7                   | 223                   | 3.96e-05             | Cct3,Cct5,Cct8,Ddx39b,Hsp90aa1,Pc na,Tcp1                                                                                                                                                                                                                                                   |
| GO:0032212 | positive regulation of telomere maintenance via telomerase               | 4                   | 31                    | 4.95e-05             | Cct3,Cct5,Cct8,Tcp1                                                                                                                                                                                                                                                                         |
| GO:0032204 | regulation of telomere maintenance                                       | 5                   | 78                    | 5.10e-05             | Cct3,Cct5,Cct8,Lmna,Tcp1                                                                                                                                                                                                                                                                    |
| GO:0016052 | carbohydrate catabolic process                                           | 5                   | 80                    | 5.59e-05             | Aldoa,Eno1,Gapdh,Ldha,Pgam1                                                                                                                                                                                                                                                                 |
| GO:0006458 | 'de novo' protein folding                                                | 4                   | 35                    | 6.80e-05             | Cct3,Cct5,Cct8,Tcp1                                                                                                                                                                                                                                                                         |
| GO:0050821 | protein stabilization                                                    | 6                   | 157                   | 6.85e-05             | Cct3,Cct5,Cct8,Gapdh,Hsp90aa1,Tc p1                                                                                                                                                                                                                                                         |
| GO:0006096 | glycolytic process                                                       | 4                   | 37                    | 7.79e-05             | Aldoa,Eno1,Gapdh,Pgam1                                                                                                                                                                                                                                                                      |
| GO:0006757 | ATP generation from ADP                                                  | 4                   | 37                    | 7.79e-05             | Aldoa,Eno1,Gapdh,Pgam1                                                                                                                                                                                                                                                                      |
| GO:0009166 | nucleotide catabolic process                                             | 5                   | 90                    | 8.27e-05             | Aldoa,Eno1,Gapdh,Ldha,Pgam1                                                                                                                                                                                                                                                                 |
| GO:0051052 | regulation of DNA metabolic process                                      | 8                   | 383                   | 8.94e-05             | Cct3,Cct5,Cct8,Ddx39b,Hsp90aa1,L mna,Pcna,Tcp1                                                                                                                                                                                                                                              |
| GO:0042866 | pyruvate biosynthetic process                                            | 4                   | 41                    | 0.00010              | Aldoa,Eno1,Gapdh,Pgam1                                                                                                                                                                                                                                                                      |
| GO:1901998 | toxin transport                                                          | 4                   | 42                    | 0.00011              | Cct3,Cct5,Cct8,Tcp1                                                                                                                                                                                                                                                                         |
| GO:0051186 | cofactor metabolic process                                               | 8                   | 403                   | 0.00012              | Alad,Aldoa,Eef1g,Eno1,Gapdh,ldh3a, Ldha,Pgam1                                                                                                                                                                                                                                               |
| GO:0055086 | nucleobase-containing small molecule metabolic process                   | 9                   | 566                   | 0.00016              | Aldoa,Eno1,Gapdh,ldh3a,Ldha,Ndufs 2,Pgam1,Uap111,Uqcrc1                                                                                                                                                                                                                                     |
| GO:0019359 | nicotinamide nucleotide biosynthetic process                             | 4                   | 54                    | 0.00025              | Aldoa,Eno1,Gapdh,Pgam1                                                                                                                                                                                                                                                                      |
| GO:0009117 | nucleotide metabolic process                                             | 8                   | 488                   | 0.00039              | Aldoa,Eno1,Gapdh,ldh3a,Ldha,Ndufs 2,Pgam1,Uqcrc1                                                                                                                                                                                                                                            |
| GO:0016043 | cellular component organization                                          | 24                  | 4560                  | 0.00051              | Alad,Aldoa,Cct3,Cct8,Dctn2,Ddx39b, Des,Fkbp4,Gapdh,Hsp90aa1,Lmna,P cna,Phgdh,Prph,Psm13,Rpsa,Ruvbl 2,Tuba3b,Tubal3,Tubb3,Tubb6,Uqcrc                                                                                                                                                        |

|            |                                                              |    |      |         |                                                                               |
|------------|--------------------------------------------------------------|----|------|---------|-------------------------------------------------------------------------------|
| GO:0006754 | ATP biosynthetic process                                     | 4  | 70   | 0.00054 | 2,Vim,Ywhab<br>Aldoa,Eno1,Gapdh,Pgam1                                         |
| GO:0046394 | carboxylic acid biosynthetic process                         | 6  | 256  | 0.00061 | Aldoa,Eno1,Gapdh,Ldha,Pgam1,Phgdh                                             |
| GO:0055114 | oxidation-reduction process                                  | 10 | 898  | 0.00069 | Aldh2,Gapdh,Idh3a,Ldha,Ndufs2,Pdia3,Pdia6,Phgdh,Uqcrc1,Uqcrc2                 |
| GO:0051701 | interaction with host                                        | 4  | 78   | 0.00073 | Alb,Ddx39b,Gapdh,Tcp1                                                         |
| GO:0007010 | cytoskeleton organization                                    | 10 | 916  | 0.00080 | Dctn2,Des,Gapdh,Lmna,Prph,Tuba3b,Tubal3,Tubb3,Tubb6,Vim                       |
| GO:0072330 | monocarboxylic acid biosynthetic process                     | 5  | 164  | 0.00080 | Aldoa,Eno1,Gapdh,Ldha,Pgam1                                                   |
| GO:1901566 | organonitrogen compound biosynthetic process                 | 11 | 1122 | 0.00080 | Alad,Aldoa,Eef1g,Eef2,Eif3f,Eif4a2,Eno1,Gapdh,Pgam1,Phgdh,Rpsa                |
| GO:2001252 | positive regulation of chromosome organization               | 5  | 166  | 0.00080 | Cct3,Cct5,Cct8,Ruvbl2,Tcp1                                                    |
| GO:0051704 | multi-organism process                                       | 14 | 1840 | 0.00091 | Alad,Alb,Aldoa,Cct3,Cct5,Cct8,Ddx39b,Eif3f,Fkbp4,Gapdh,Hspa11,Hspb1,Lyz1,Tcp1 |
| GO:1904951 | positive regulation of establishment of protein localization | 7  | 424  | 0.00094 | Cct3,Cct5,Cct8,Gapdh,Hsp90aa1,Hspa11,Tcp1                                     |
| GO:0051188 | cofactor biosynthetic process                                | 5  | 175  | 0.00097 | Alad,Aldoa,Eno1,Gapdh,Pgam1                                                   |

**Table S2:** KEGG pathway analysis.

| #term ID | term description             | observed gene count | background gene count | false discovery rate | matching proteins in network (labels)                                               |
|----------|------------------------------|---------------------|-----------------------|----------------------|-------------------------------------------------------------------------------------|
| mmu00010 | Glycolysis / Gluconeogenesis | 6                   | 65                    | 1.25e-06             | Aldh2,Aldoa,Eno1,Gapdh,Ldha,Pgam1                                                   |
| mmu01230 | Biosynthesis of amino acids  | 6                   | 75                    | 1.40e-06             | Aldoa,Eno1,Gapdh,Idh3a,Pgam1,Phgdh                                                  |
| mmu01200 | Carbon metabolism            | 6                   | 118                   | 1.19e-05             | Aldoa,Eno1,Gapdh,Idh3a,Pgam1,Phgdh                                                  |
| mmu01100 | Metabolic pathways           | 14                  | 1296                  | 2.21e-05             | Alad,Aldh2,Aldoa,Eno1,Fdps,Gapdh,Idh3a,Ldha,Ndufs2,Pgam1,Phgdh,Uap111,Uqcrc1,Uqcrc2 |
